# Supplementary material
Source: ML conference proceedings conference paper supplement (https://openreview.net/forum?id=RP1CtZhEmR)
Supplement: supplementary_material [file attachment]

Real Data

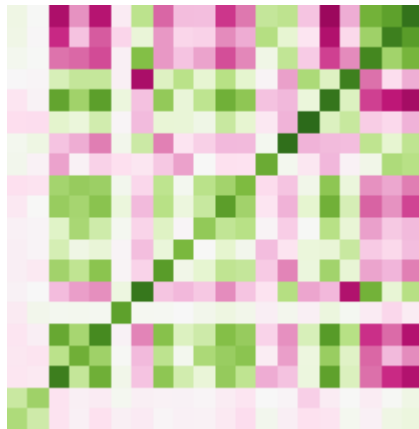

COSCI-GAN

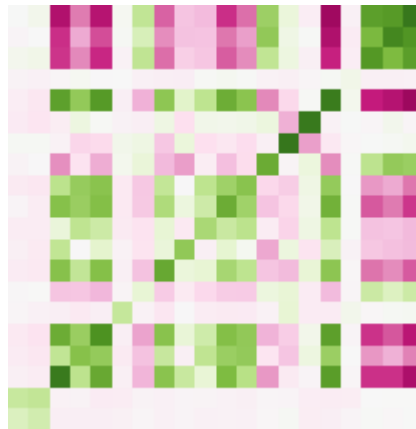

Time GAN

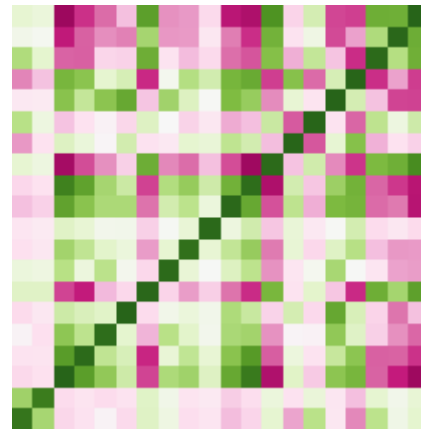

Fourier Flow

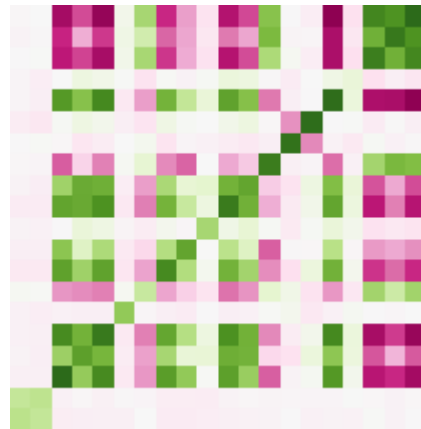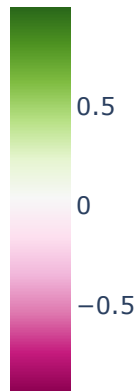

Feature Channel 2

Feature Channel 1

Feature Channel 1

Feature Channel 1

Feature Channel 1
