# Supplementary material
Source: ML conference proceedings conference paper supplement (https://openreview.net/forum?id=RP1CtZhEmR)

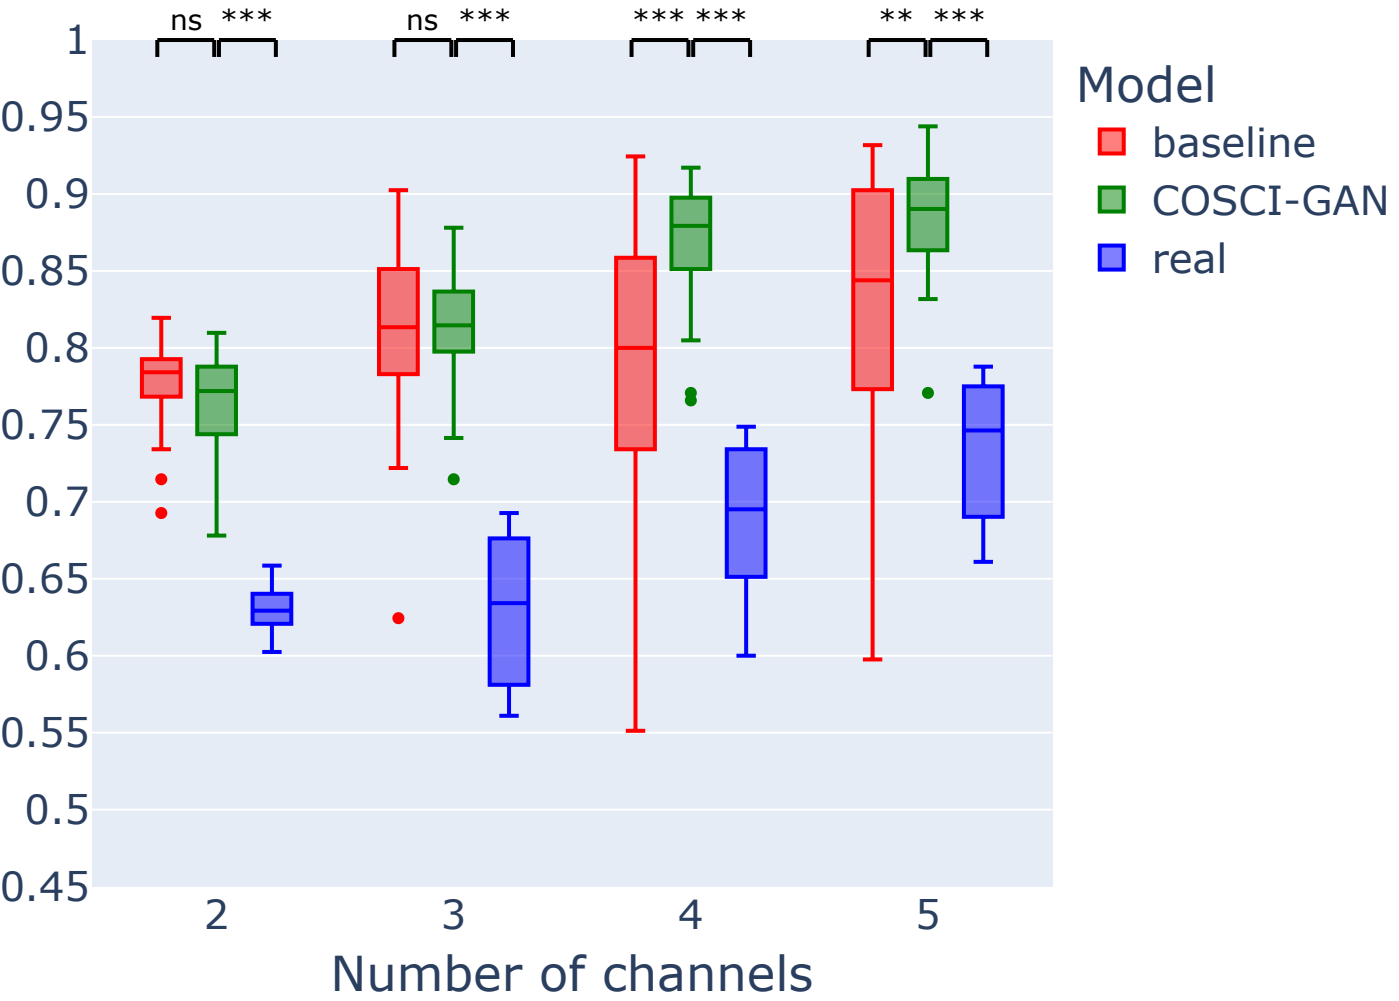

Supplement: supplementary_material [file attachment]

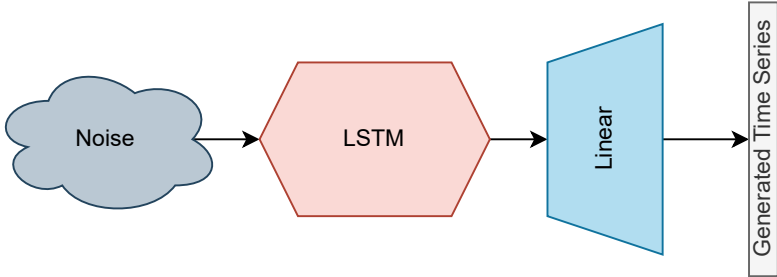

Supplement: supplementary_material [file attachment]

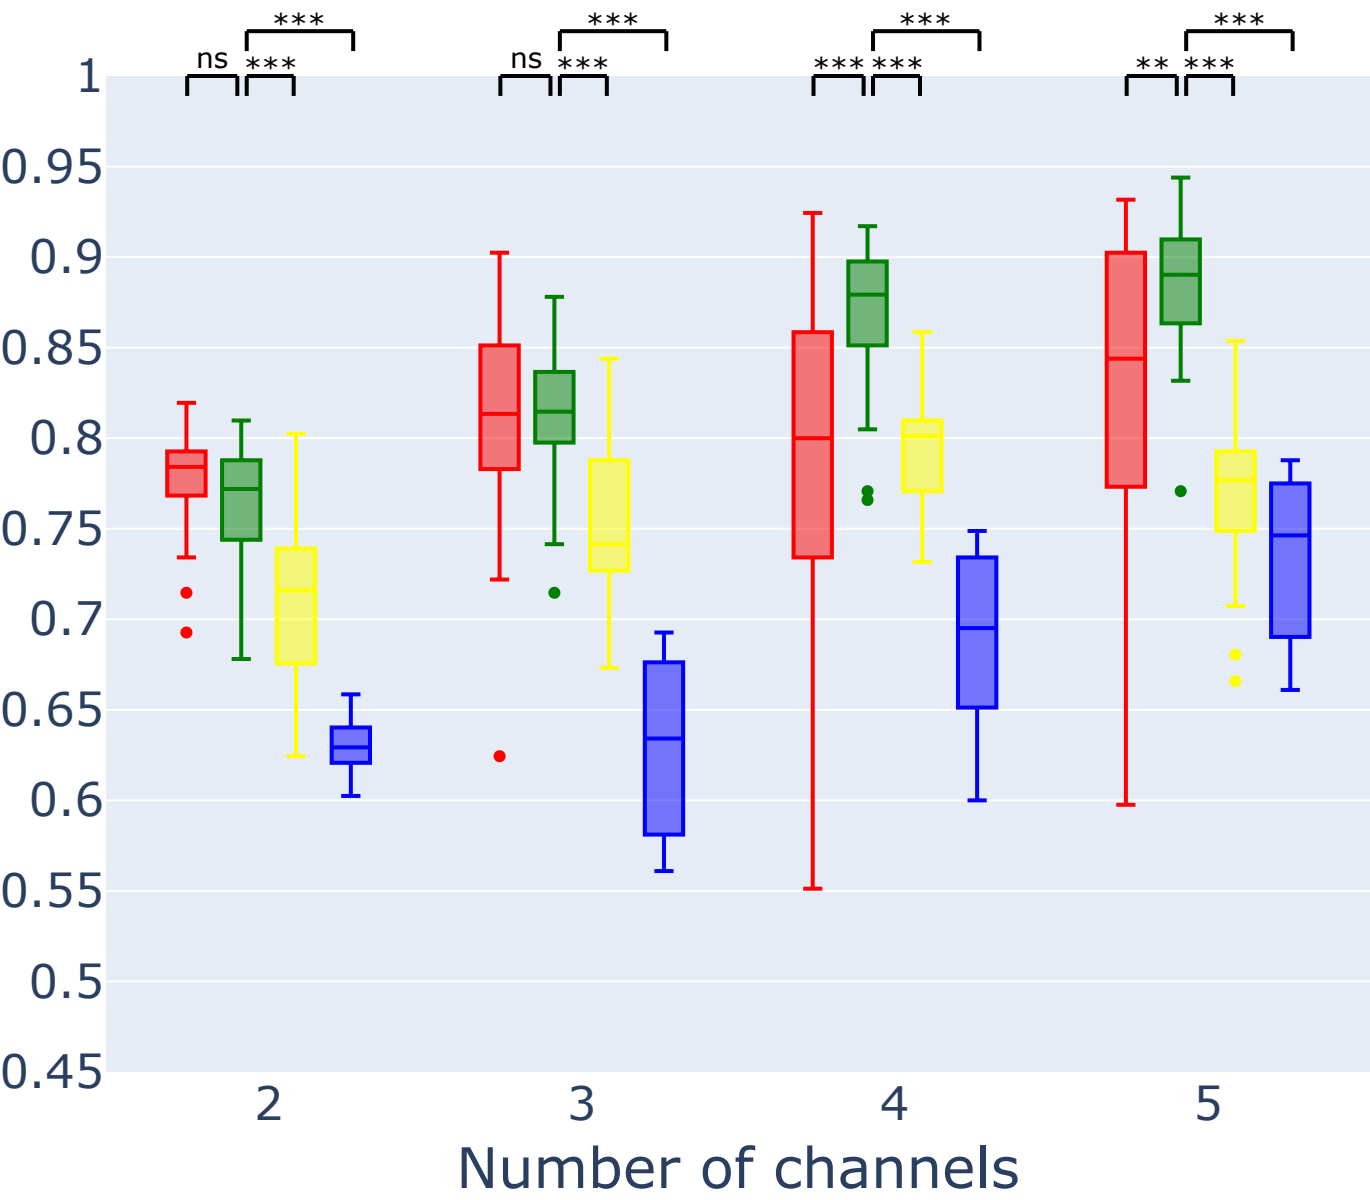

Supplement: supplementary_material [file attachment]

Real Data

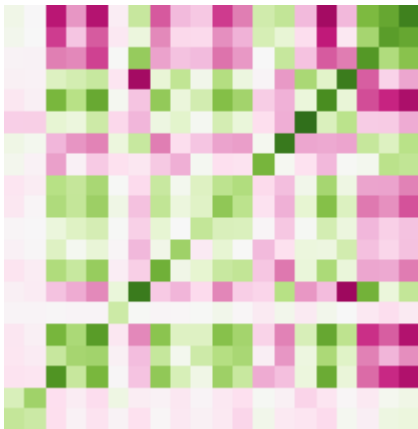

COSCI-GAN

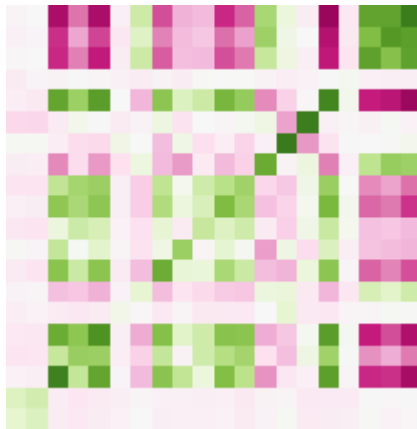

Time GAN

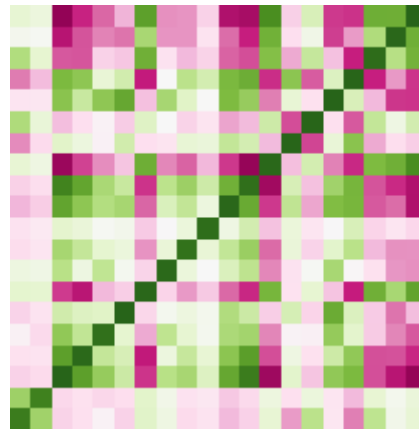

Fourier Flow

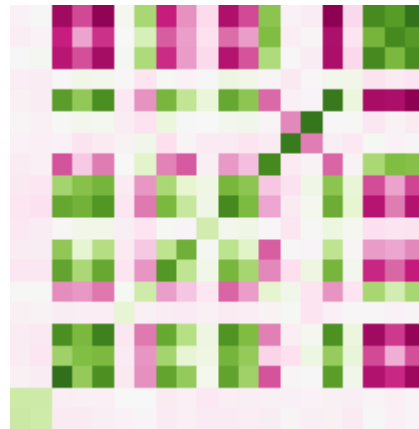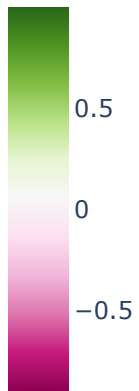

Supplement: supplementary_material [file attachment]

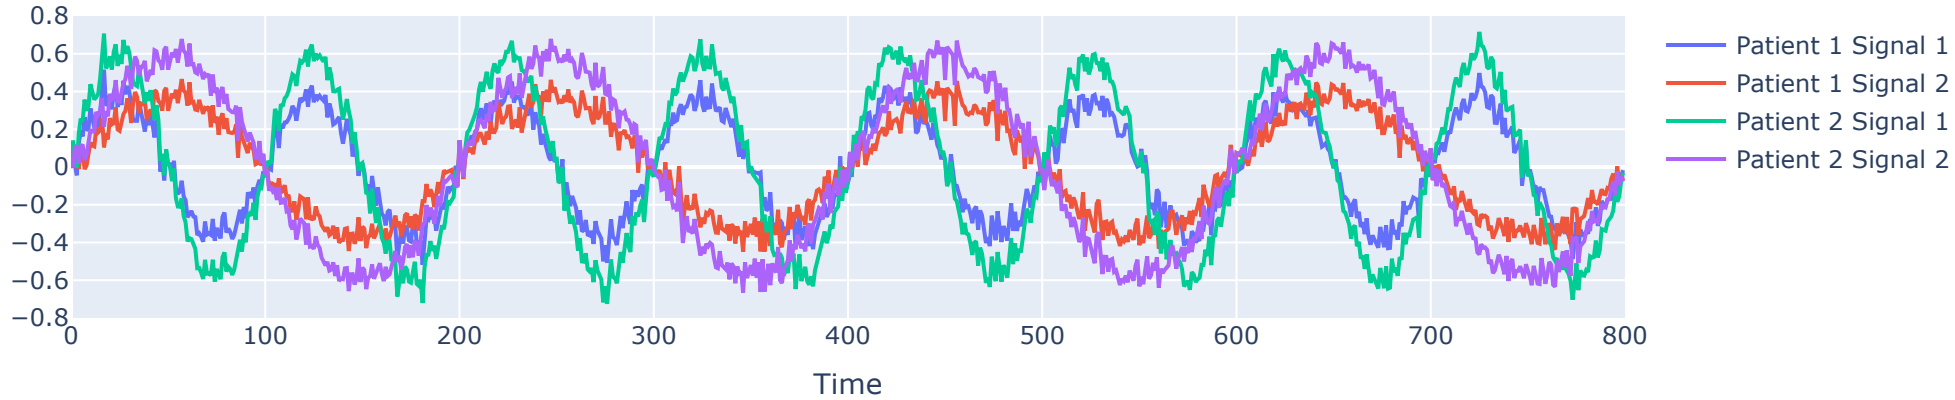

Supplement: supplementary_material [file attachment]

Real Data

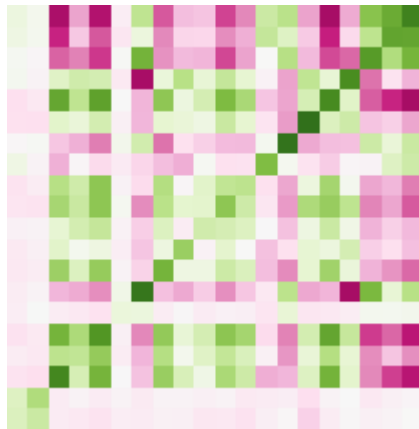

COSCI-GAN

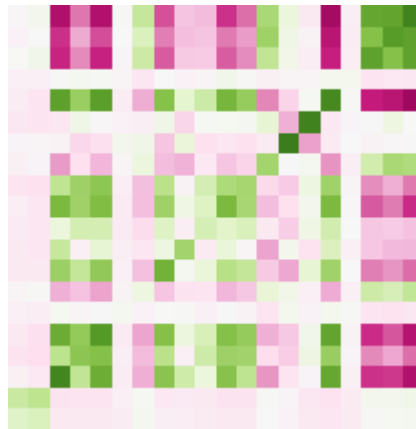

Time GAN

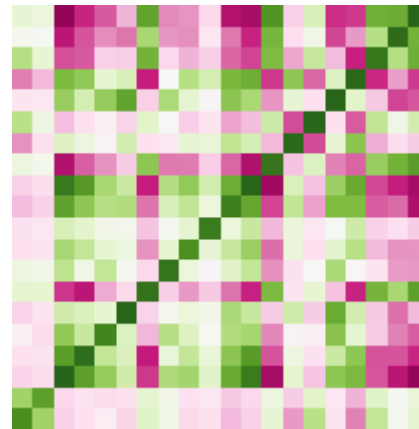

Fourier Flow

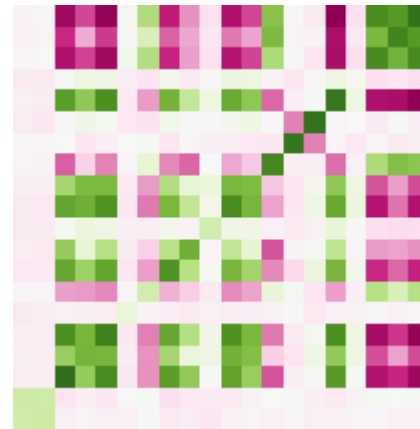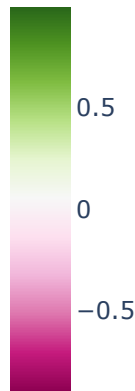

Supplement: supplementary_material [file attachment]

Feature Channel 2

Real Data

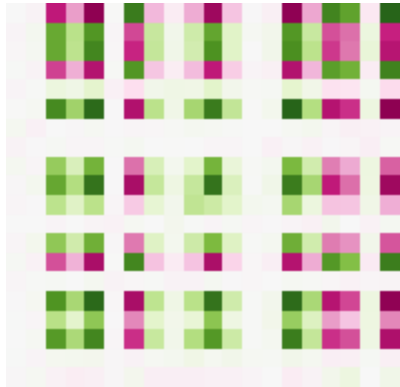

Feature Channel 1

Without CD

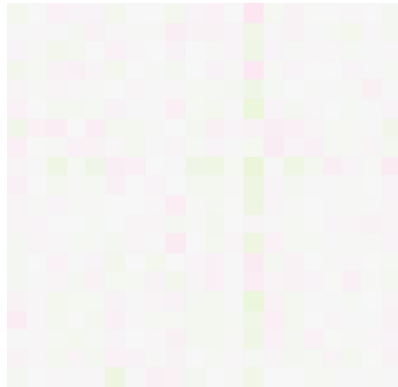

Feature Channel 1

With CD

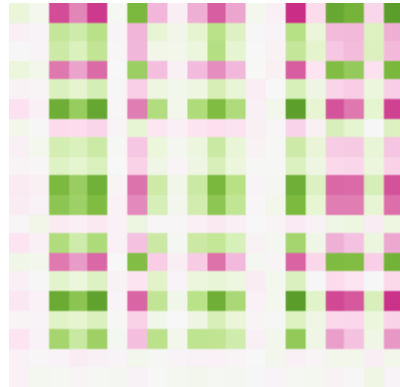

Feature Channel 1

0.5

0

-0.5

Supplement: supplementary_material [file attachment]

PCA plot

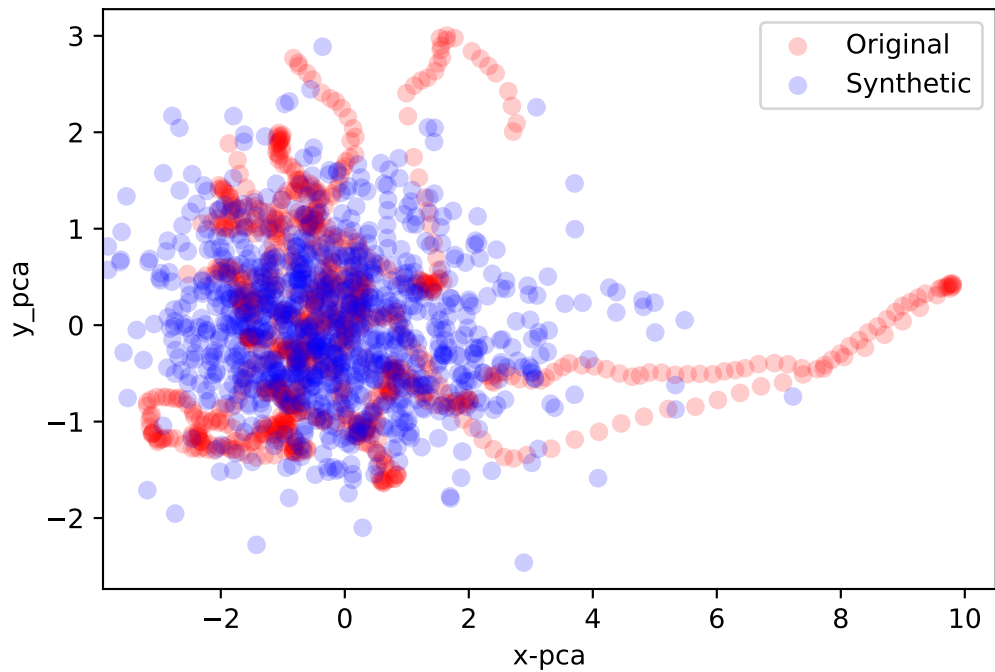

Supplement: supplementary_material [file attachment]

Real Data

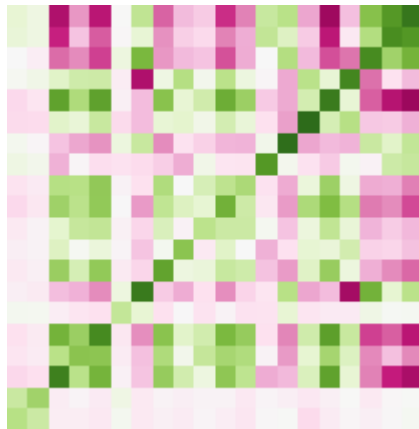

COSCI-GAN

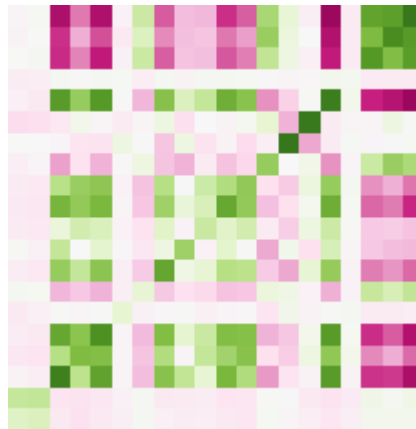

Time GAN

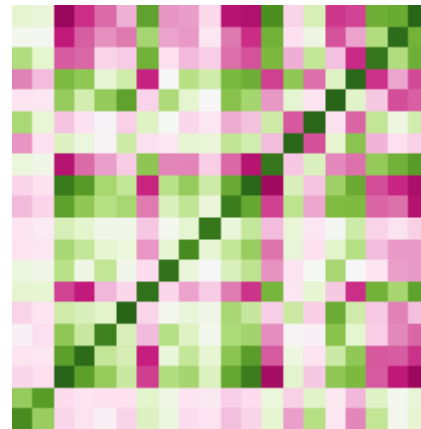

Fourier Flow

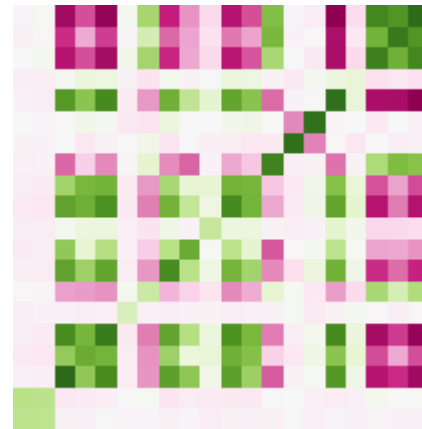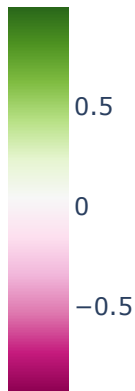

Supplement: supplementary_material [file attachment]

Real Data

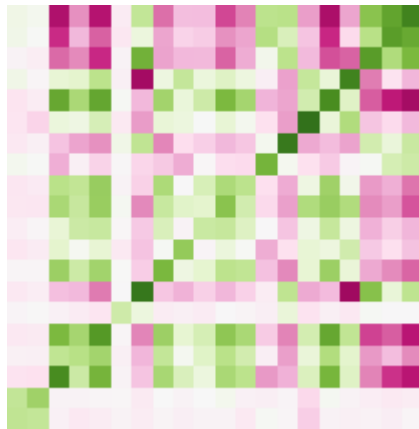

COSCI-GAN

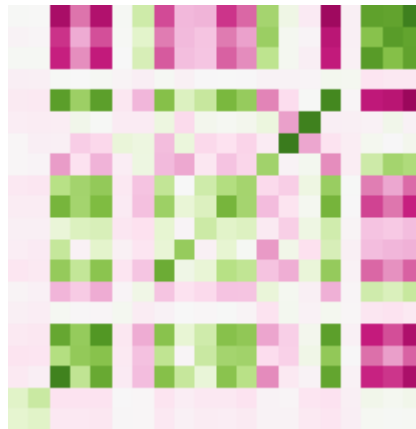

Time GAN

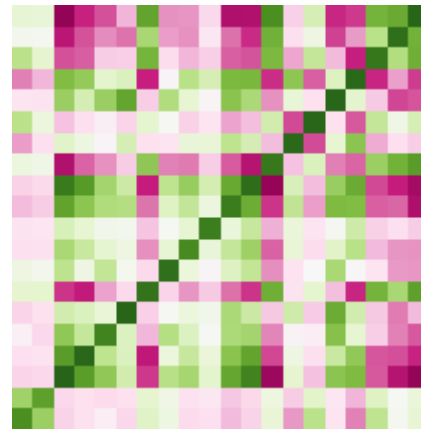

Fourier Flow

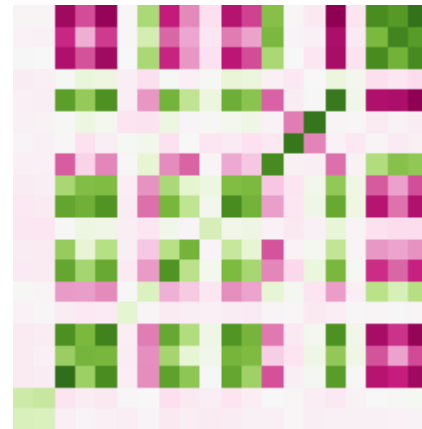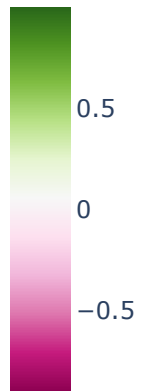

Supplement: supplementary_material [file attachment]

t-SNE plot

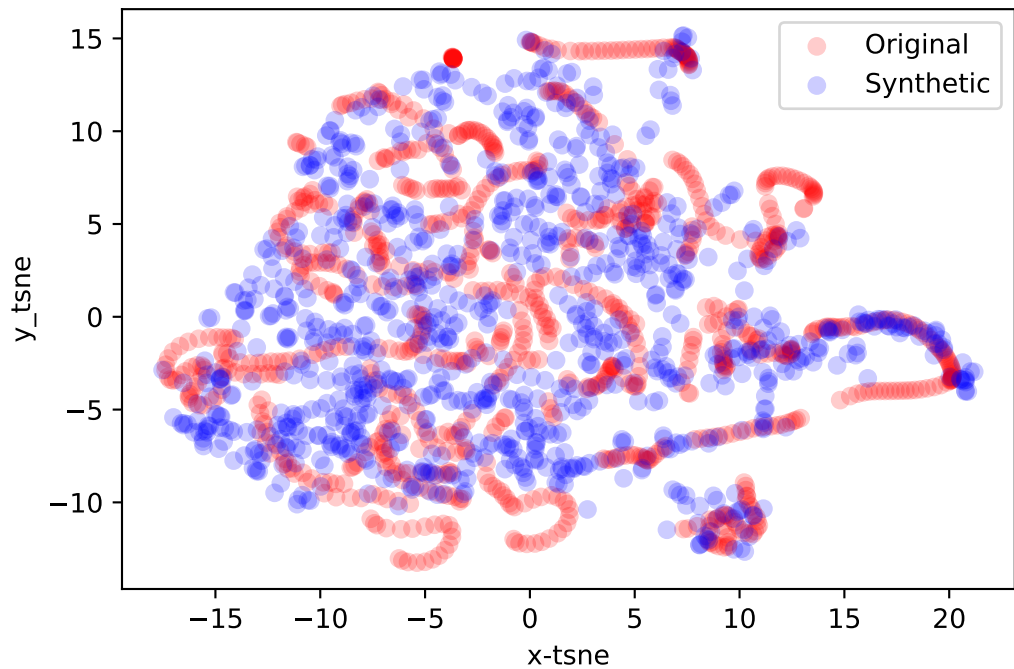

Supplement: supplementary_material [file attachment]

Real Data

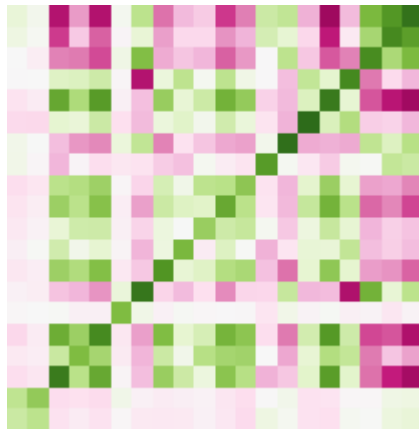

COSCI-GAN

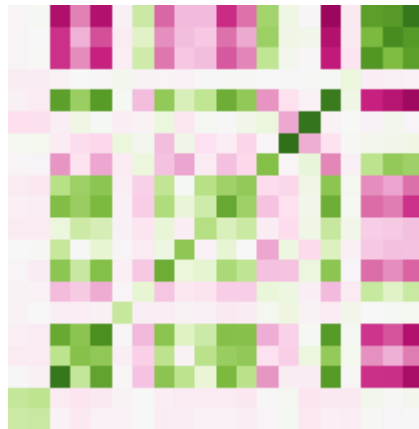

Time GAN

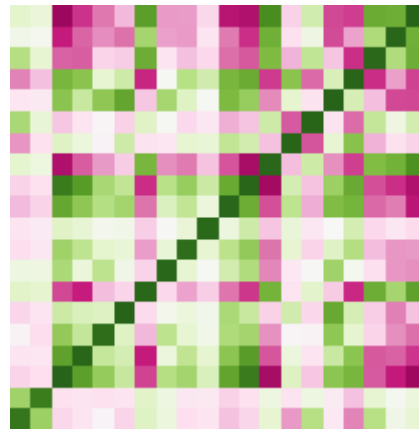

Fourier Flow

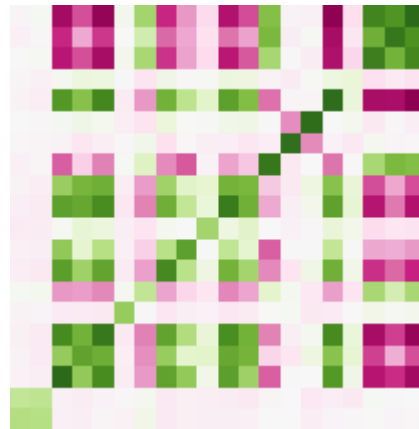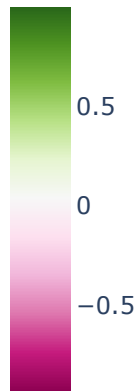

Supplement: supplementary_material [file attachment]

t-SNE plot

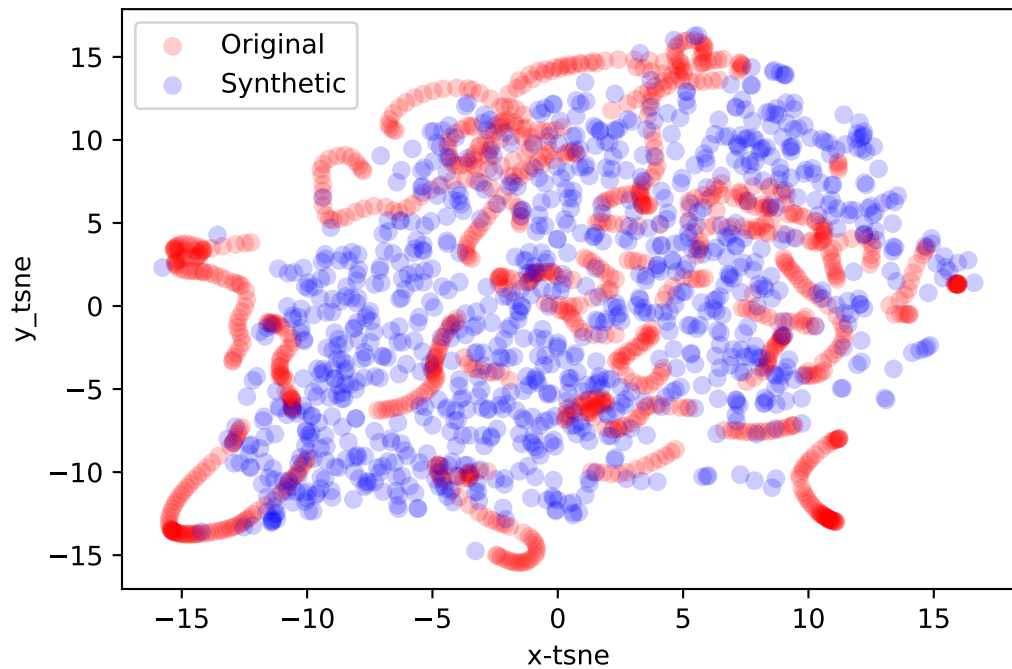

Supplement: supplementary_material [file attachment]

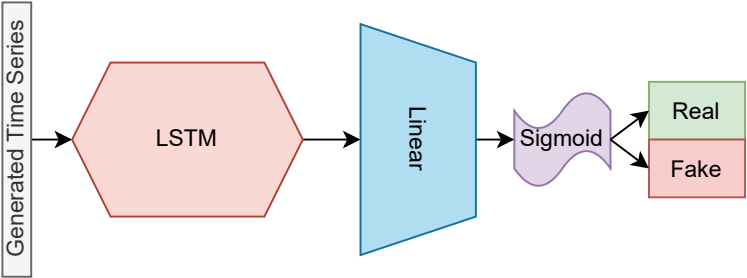

Supplement: supplementary_material [file attachment]

t-SNE plot

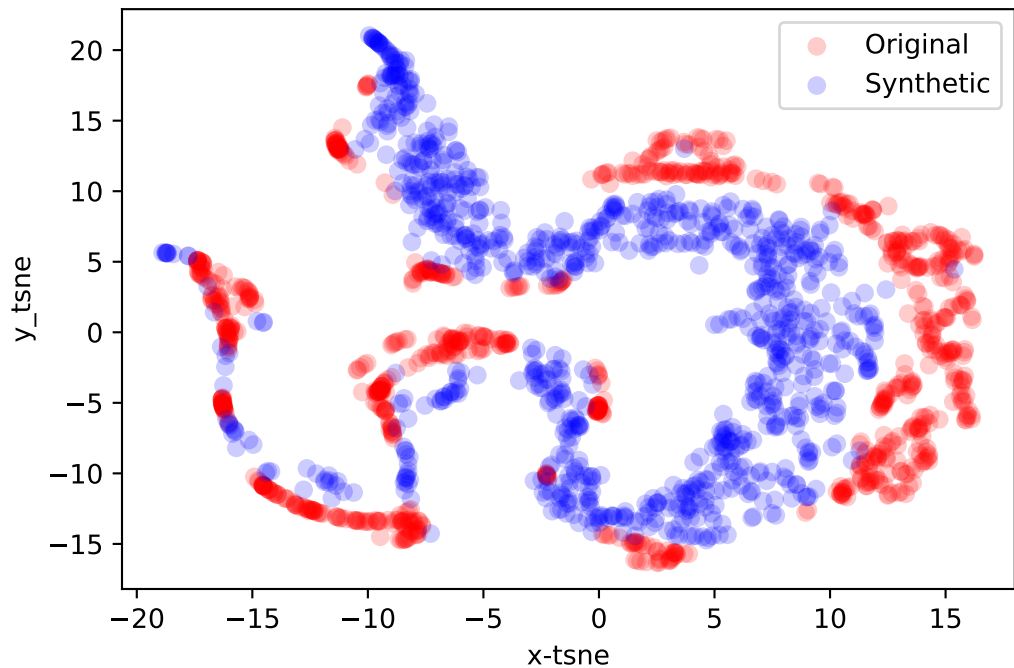

Supplement: supplementary_material [file attachment]

PCA plot

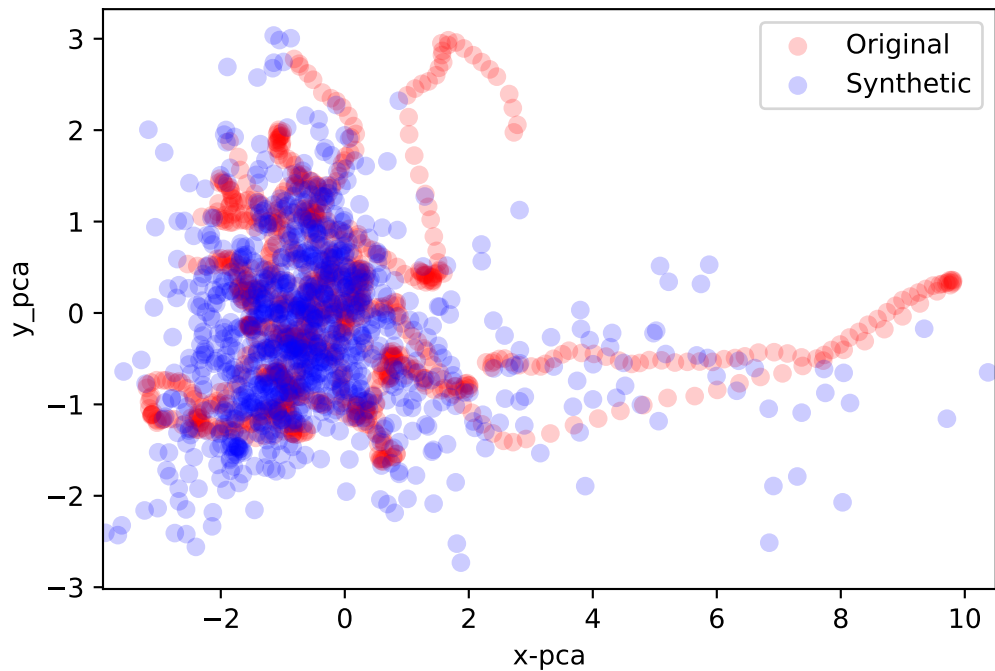

Supplement: supplementary_material [file attachment]

Real Data

Feature Channel 2

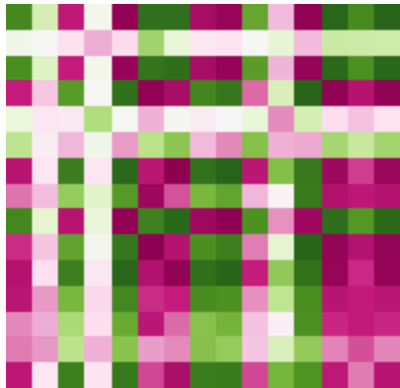

Without CD

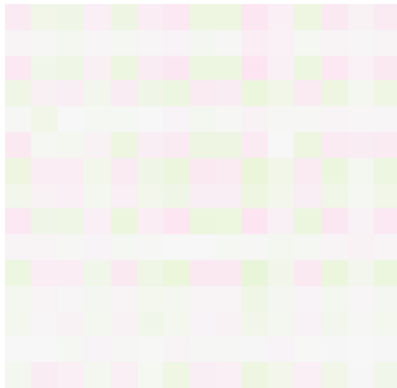

With CD

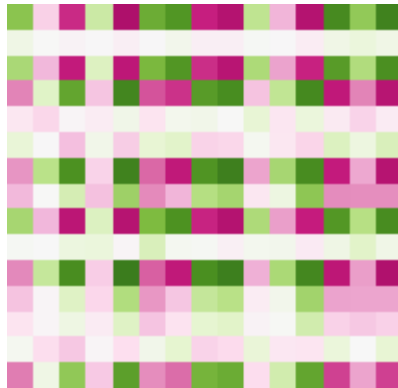

1

0.5

0

-0.5

Feature Channel 1

Feature Channel 1

Supplement: supplementary_material [file attachment]

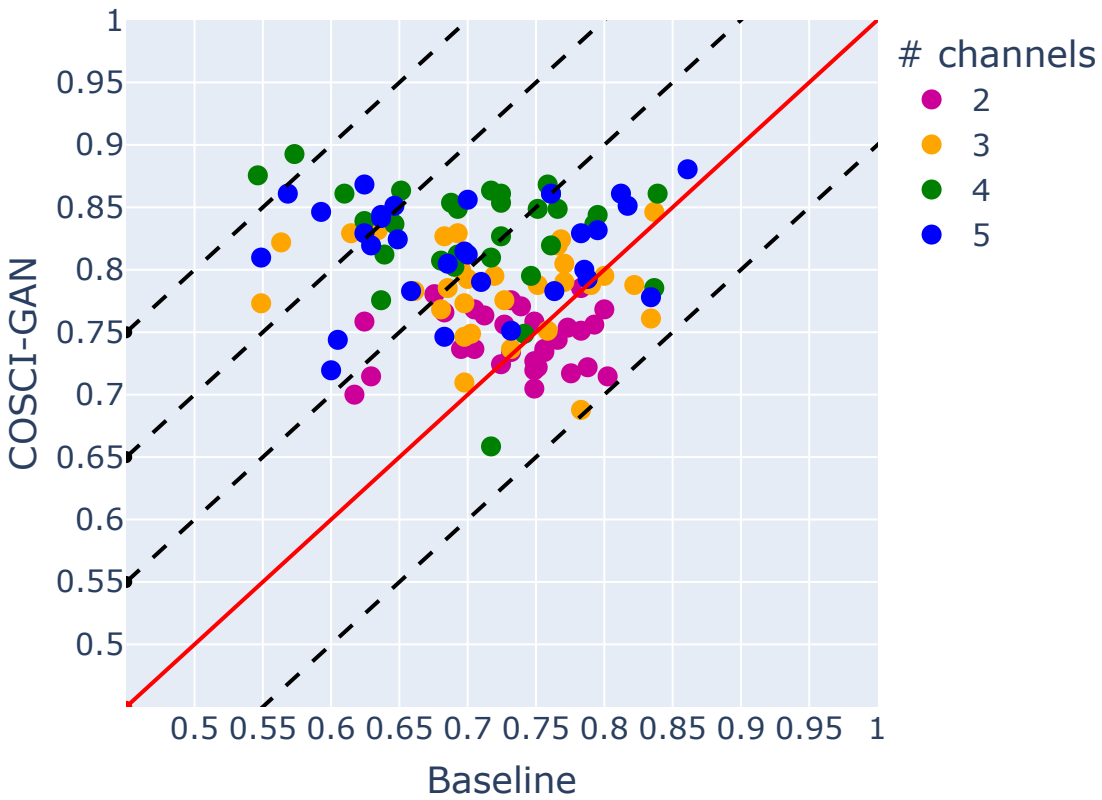

Supplement: supplementary_material [file attachment]

Real Data

Feature Channel 2

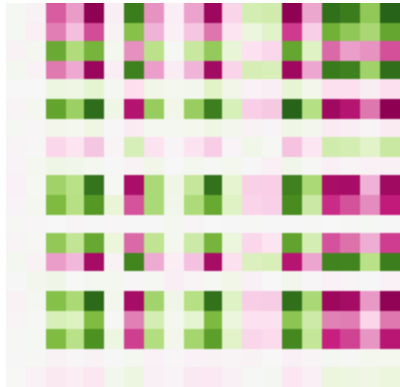

Feature Channel 1

Without CD

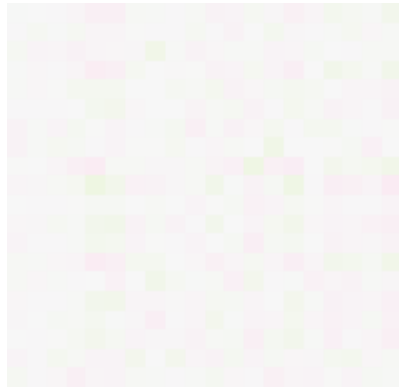

Feature Channel 1

With CD

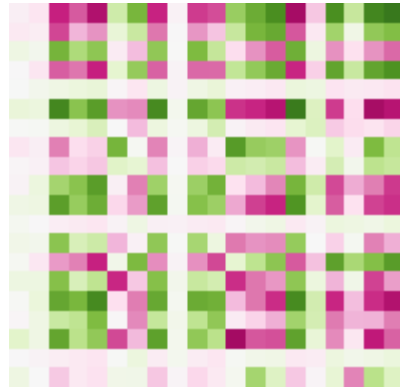

Feature Channel 1

0.5

0

-0.5

Supplement: supplementary_material [file attachment]

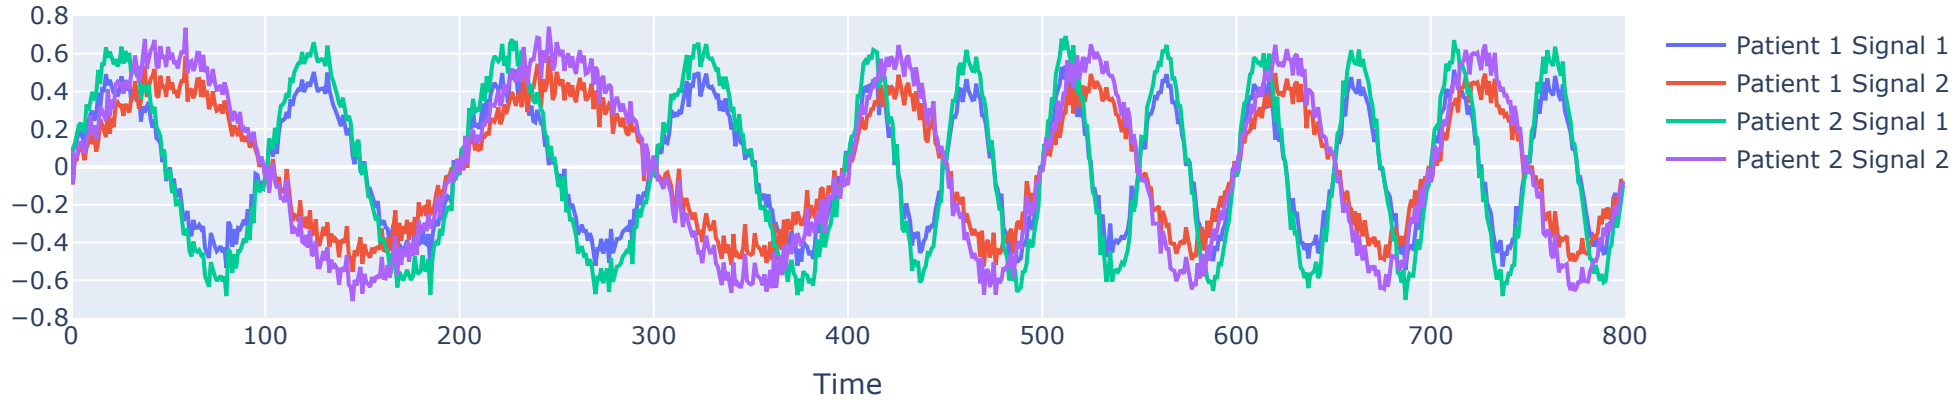

Supplement: supplementary_material [file attachment]

t-SNE plot

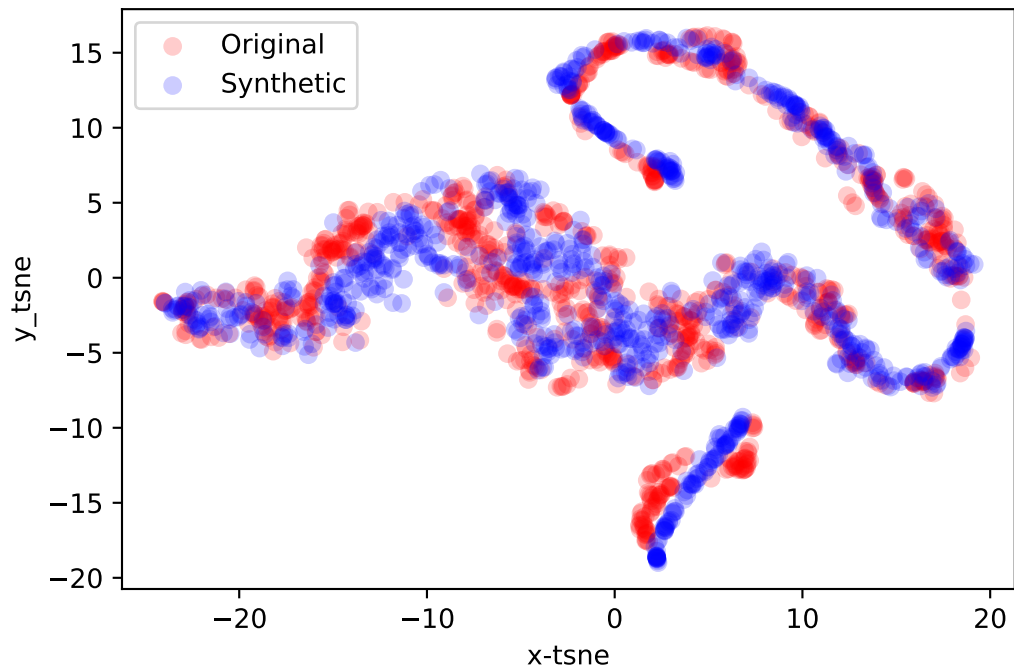

Supplement: supplementary_material [file attachment]

PCA plot

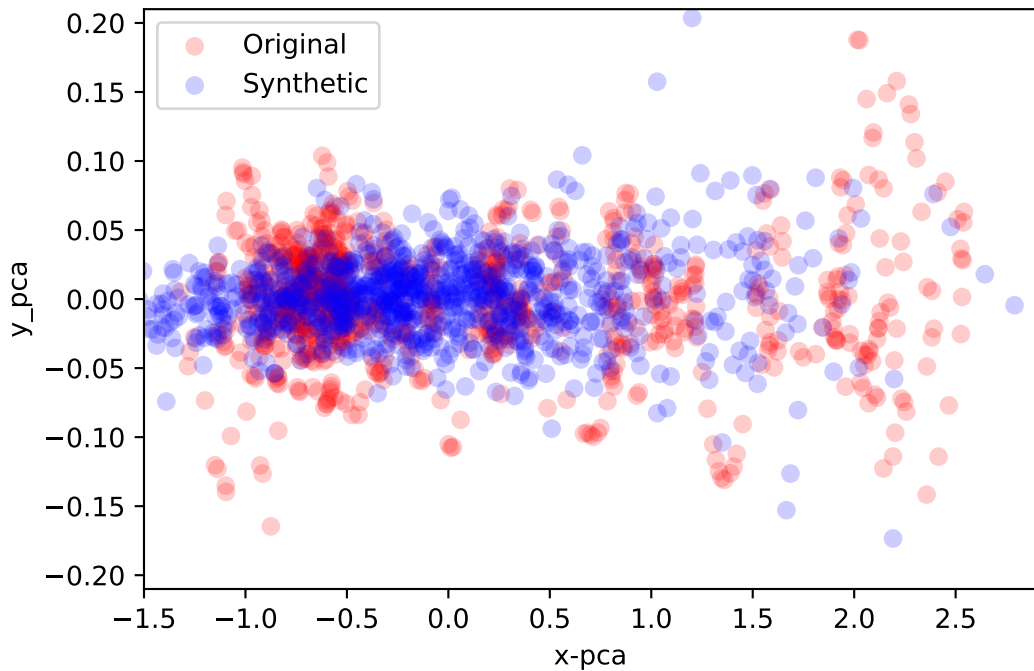

Supplement: supplementary_material [file attachment]

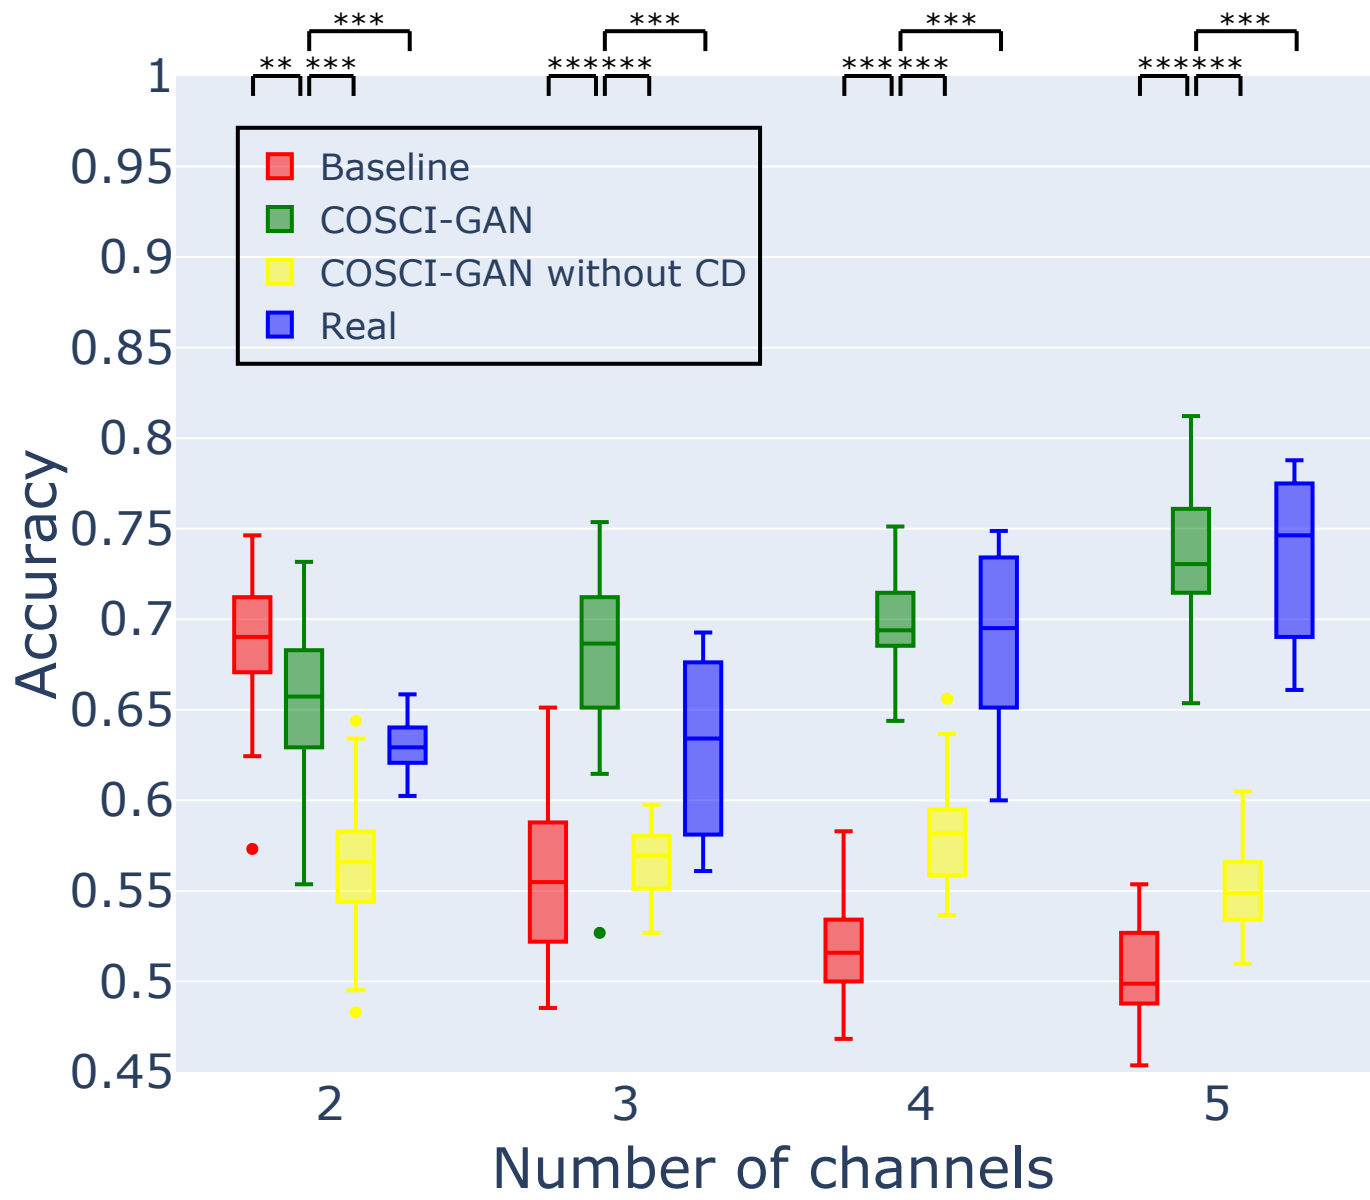

Supplement: supplementary_material [file attachment]

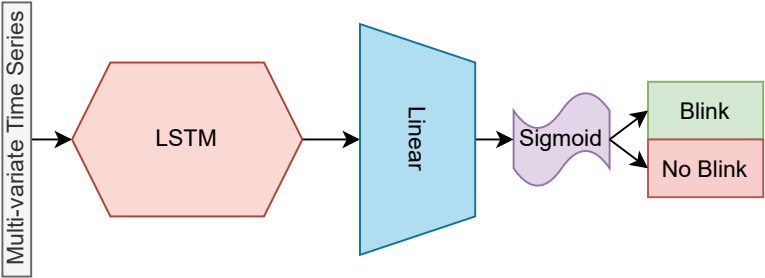

Supplement: supplementary_material [file attachment]

Real Data

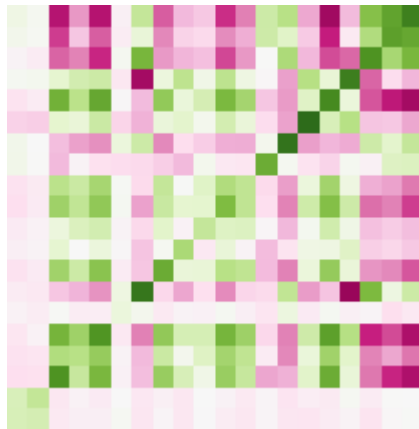

COSCI-GAN

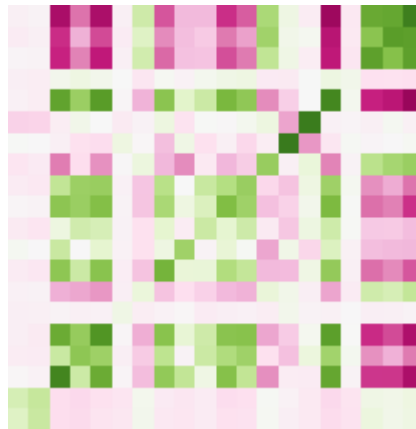

Time GAN

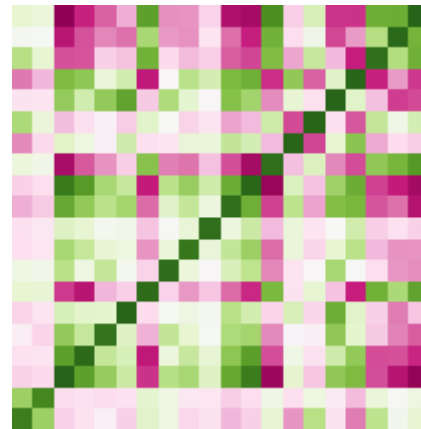

Fourier Flow

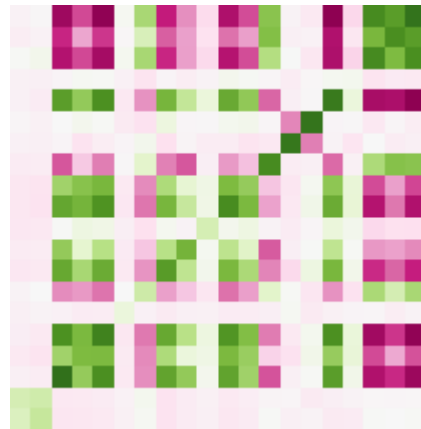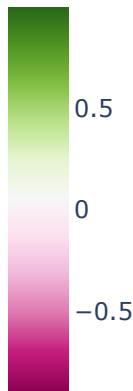

Supplement: supplementary_material [file attachment]

Real Data

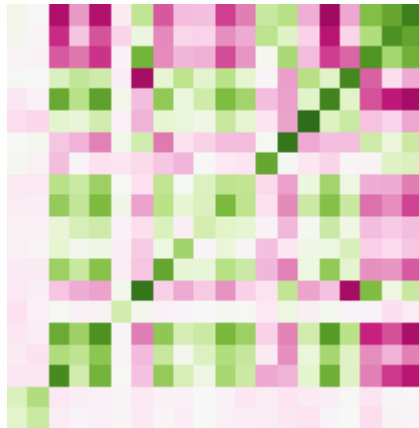

COSCI-GAN

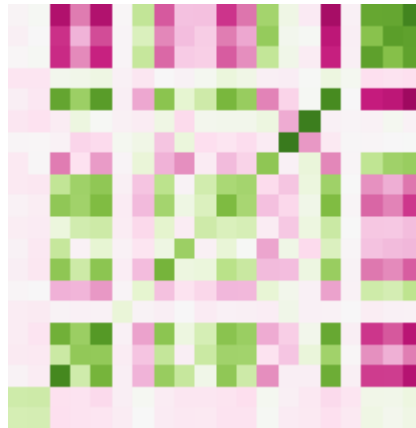

Time GAN

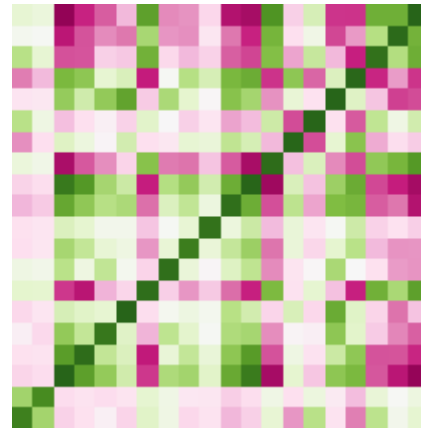

Fourier Flow

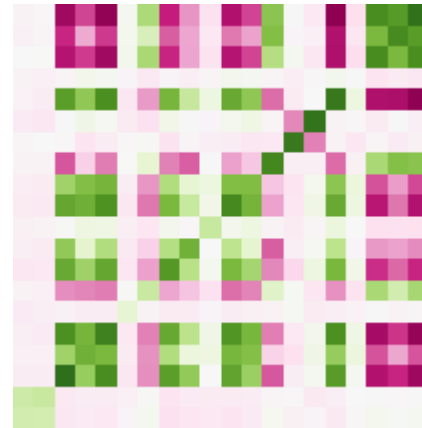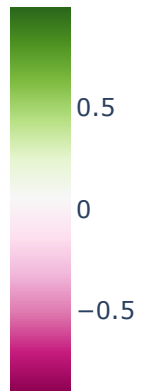

Supplement: supplementary_material [file attachment]

t-SNE plot

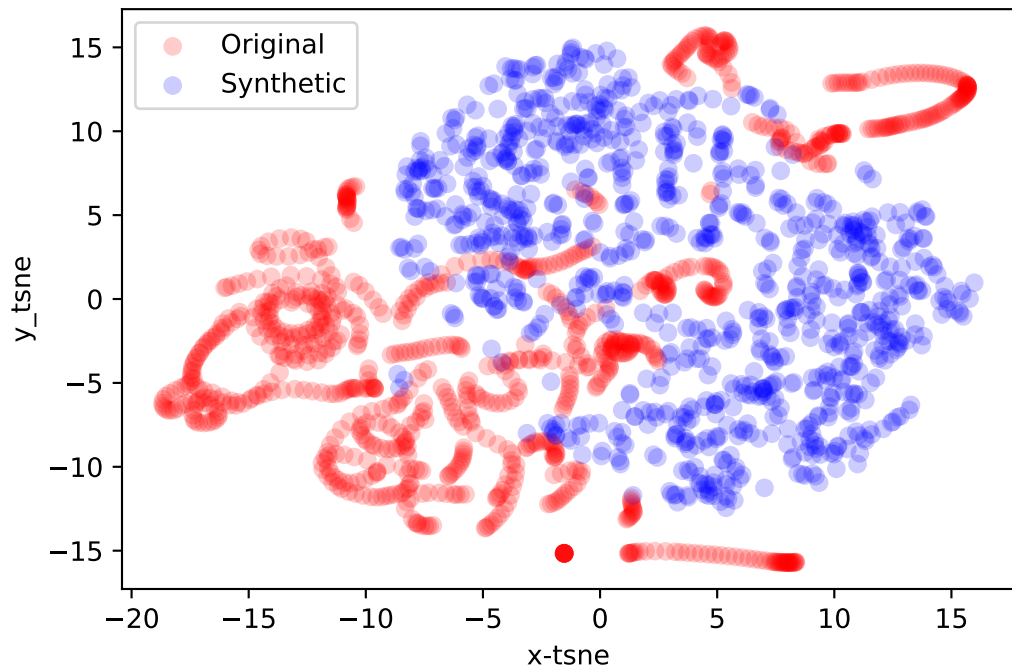

Supplement: supplementary_material [file attachment]

Real Data

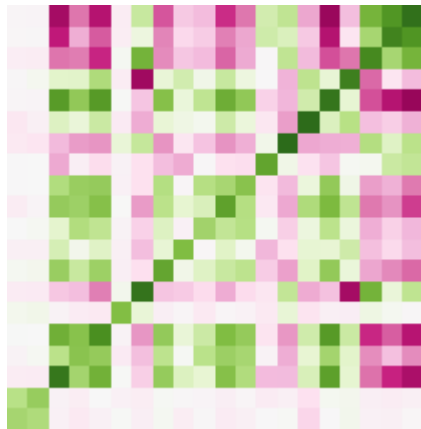

COSCI-GAN

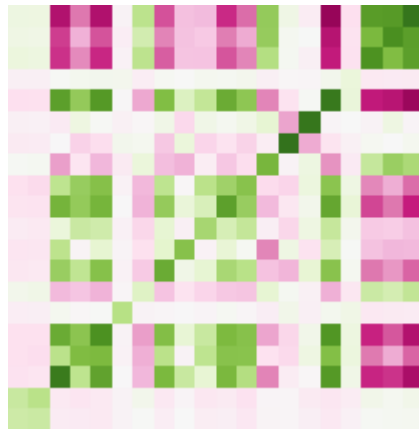

Time GAN

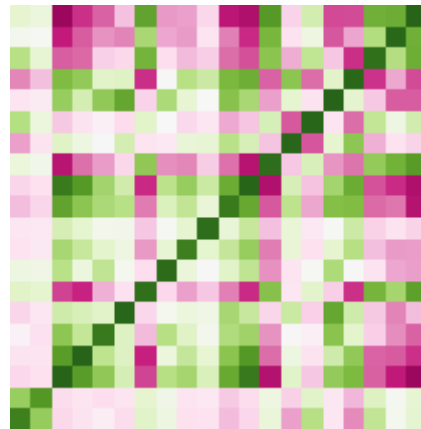

Fourier Flow

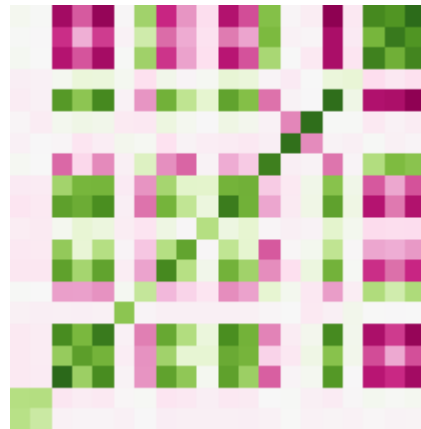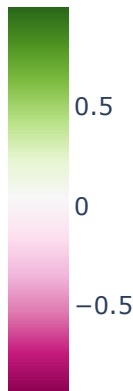

Supplement: supplementary_material [file attachment]

Real Data

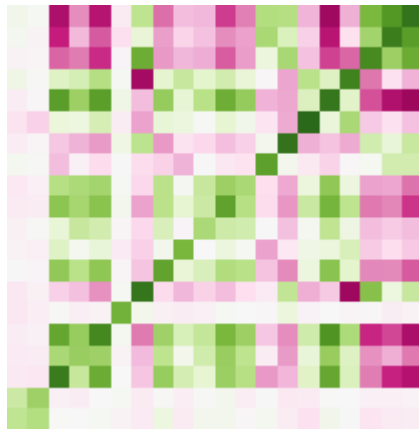

COSCI-GAN

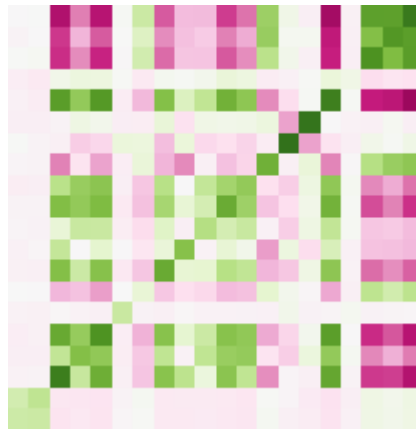

Time GAN

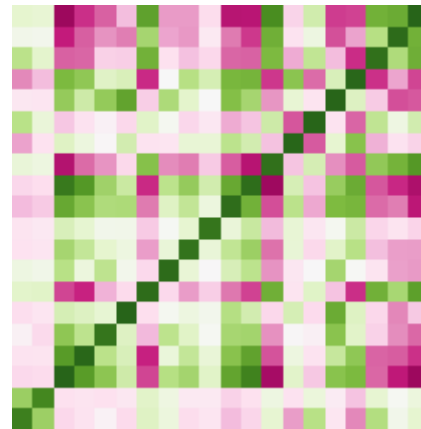

Fourier Flow

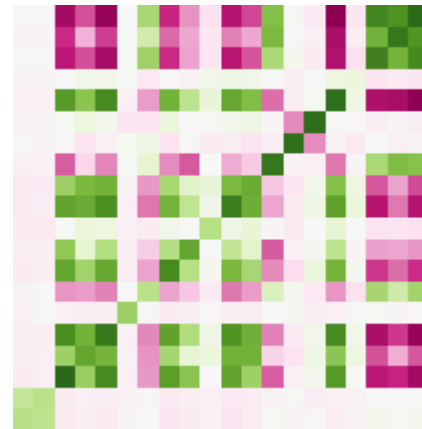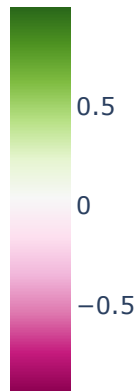

Supplement: supplementary_material [file attachment]

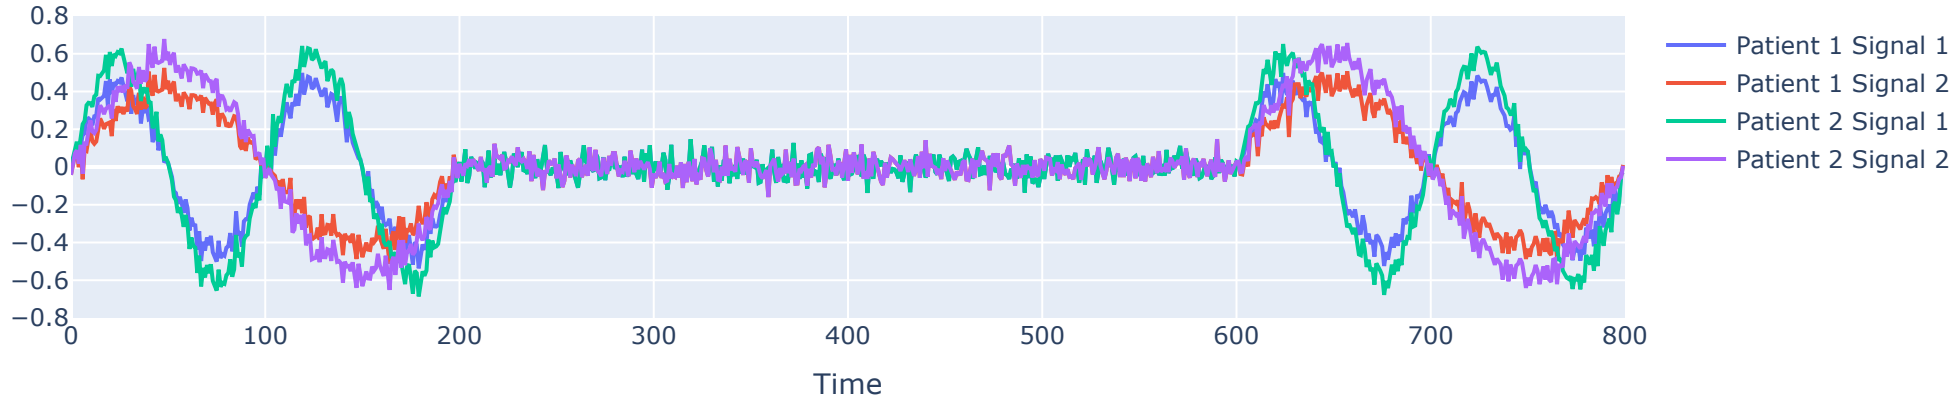

Supplement: supplementary_material [file attachment]

PCA plot

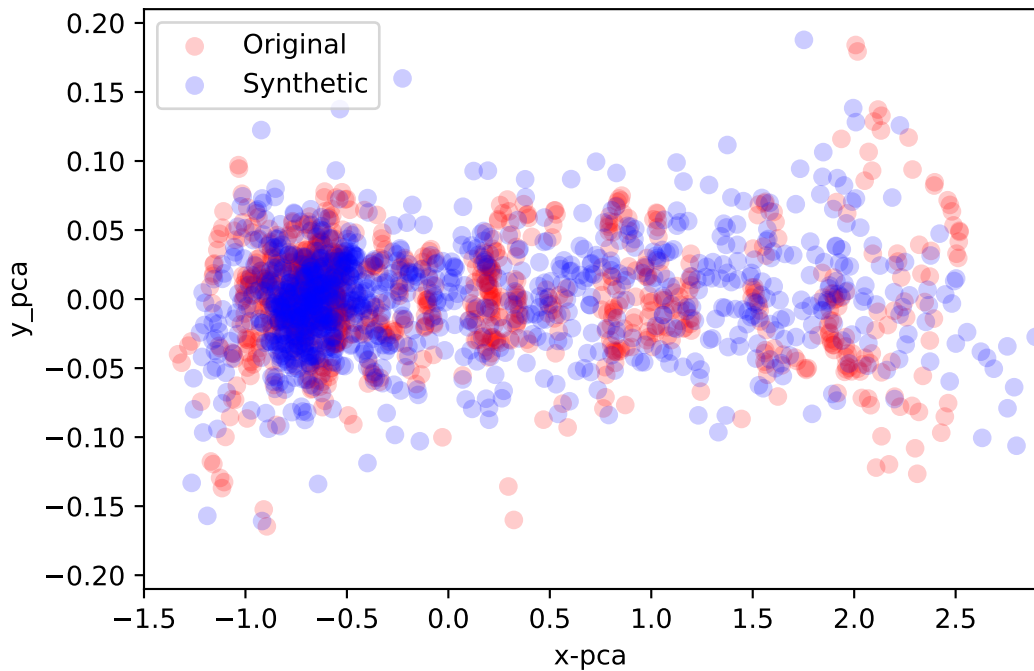

Supplement: supplementary_material [file attachment]

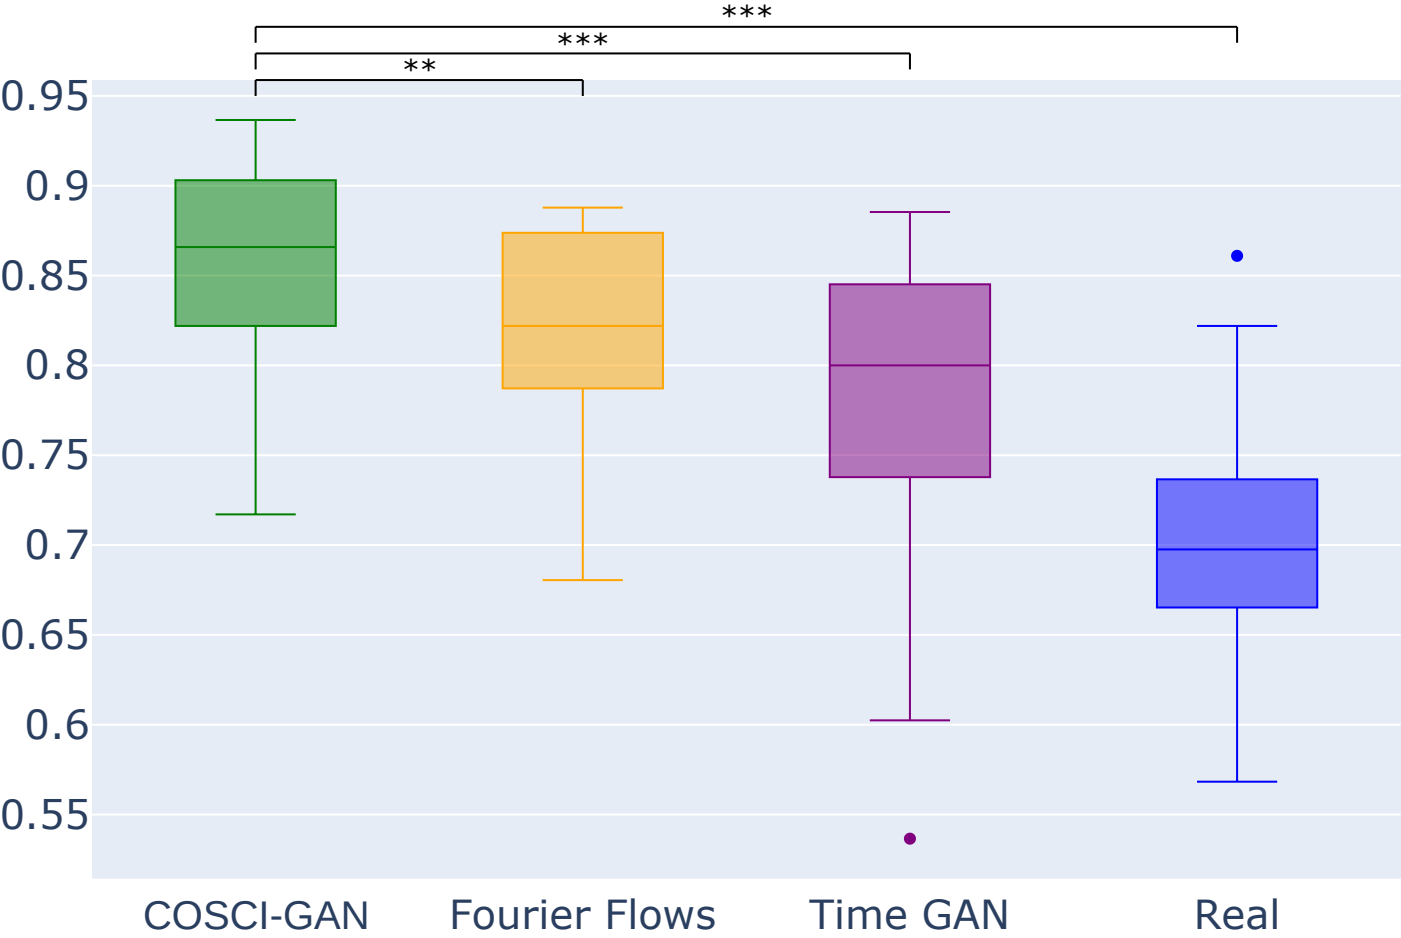

Supplement: supplementary_material [file attachment]

PCA plot

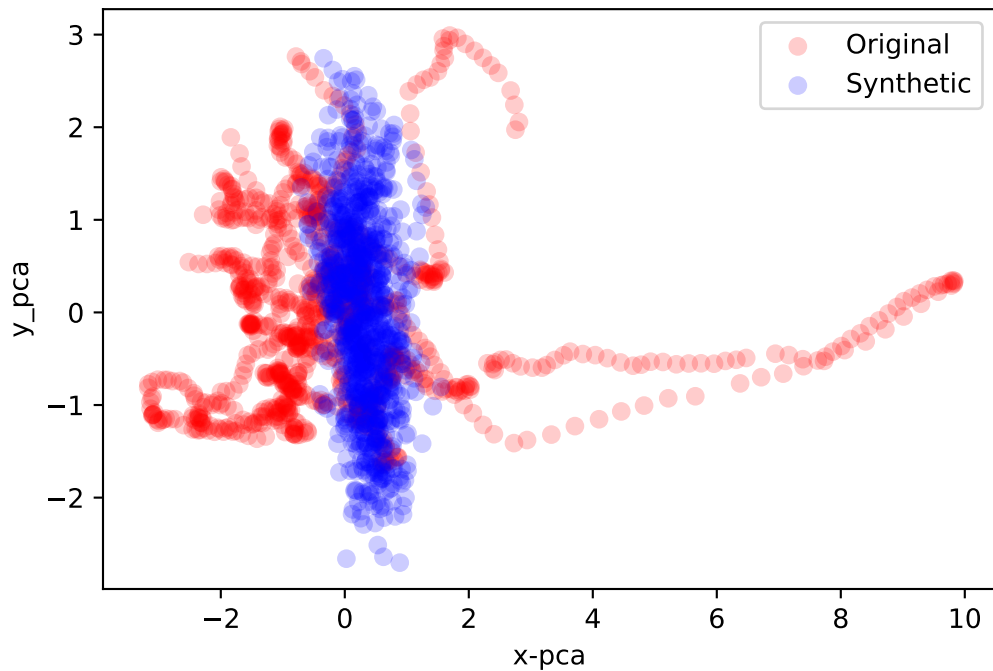

Supplement: supplementary_material [file attachment]

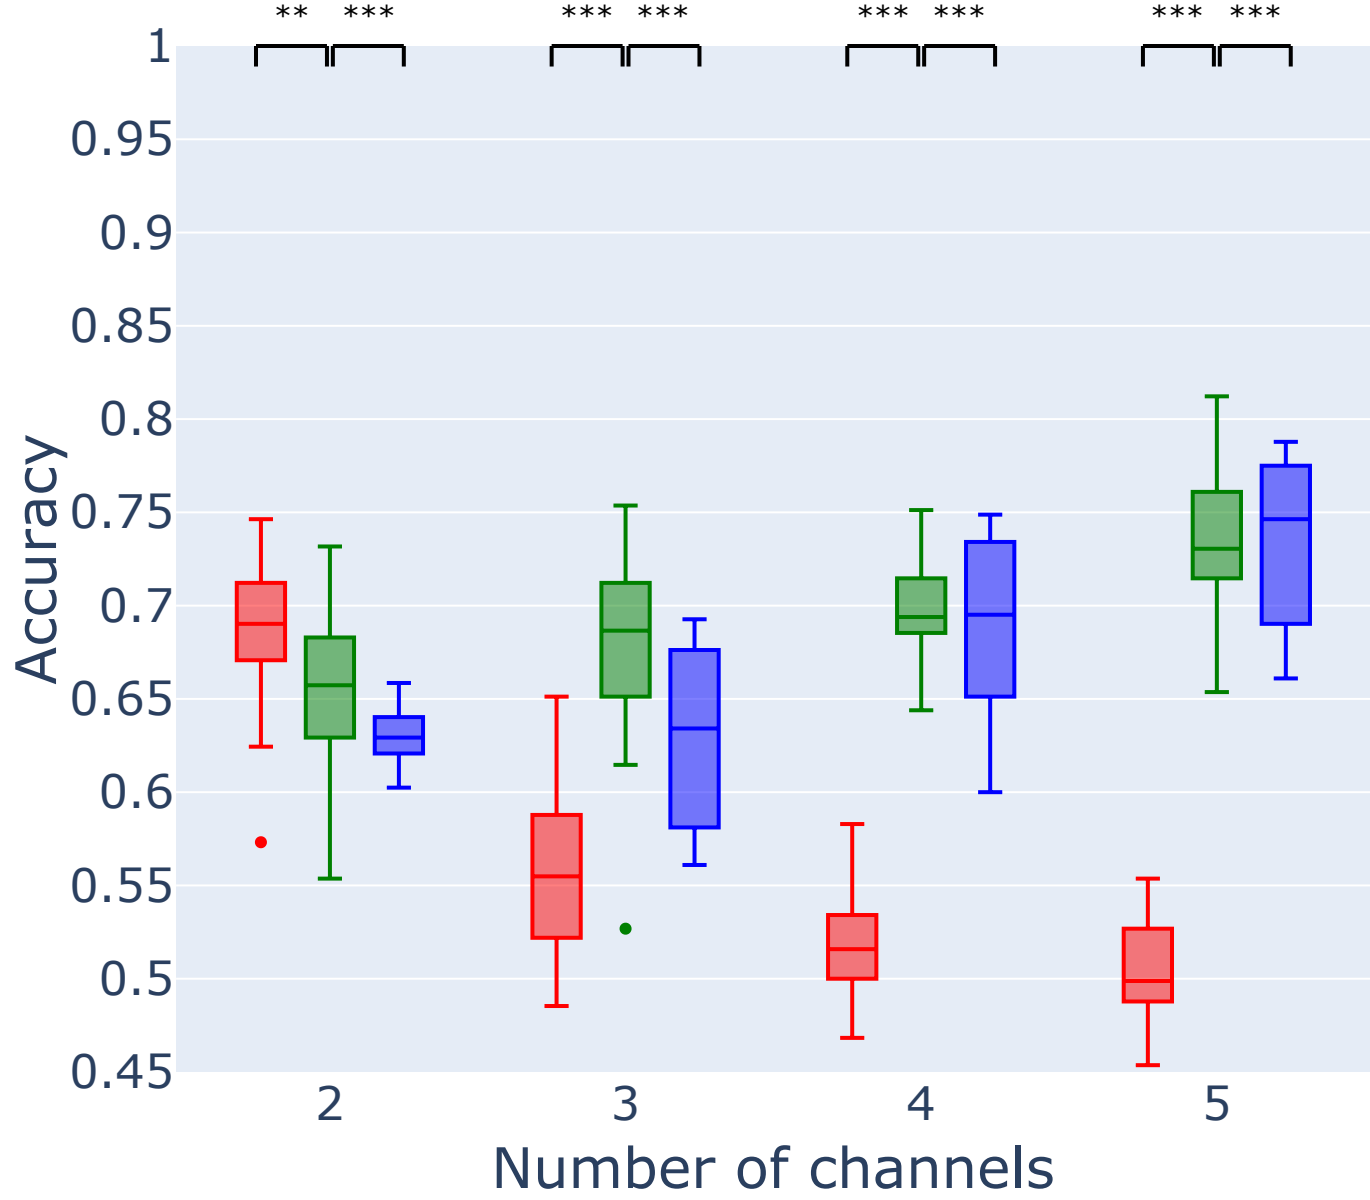

Supplement: supplementary_material [file attachment]
